# Supplementary material for: Synthesis of Fe–ferrite composite nanotubes with excellent microwave absorption performance
Source: Royal Society of Chemistry journal article supplement (doi:10.1039/c1ce05397c), 2011-01-01
Supplement: c1ce05397c.pdf [file c1ce05397c.pdf]

## Electronic Supplementary Information for

### Synthesis of Fe/ferrite composite nanotubes with excellent microwave absorption performance

Yuan-Xun Gong,<sup>a</sup> Liang Zhen,<sup>\*, a, b</sup> Jian-Tang Jiang,<sup>a</sup> Cheng-Yan Xu,<sup>a, b</sup> Wen-Shou Wang,<sup>a</sup> and

Wen-Zhu Shao<sup>a</sup>

<sup>a</sup> School of Materials Science and Engineering, Harbin Institute of Technology, Harbin 150001, China.

<sup>b</sup> MOE Key Laboratory of Micro-systems and Micro-structures Manufacturing, Harbin Institute of Technology, Harbin 150001, China

Fax: 86 451 8641 3922; Tel: 86 451 8641 2133; E-mail: lzh@hit.edu.cn (L. Zhen)

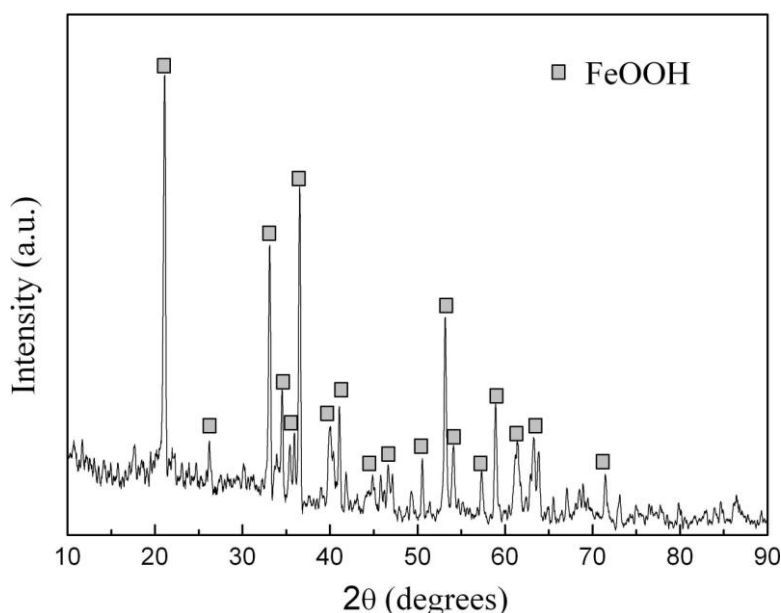

**Fig. S1** XRD pattern of the  $\alpha$ -FeOOH precursor nanowires.

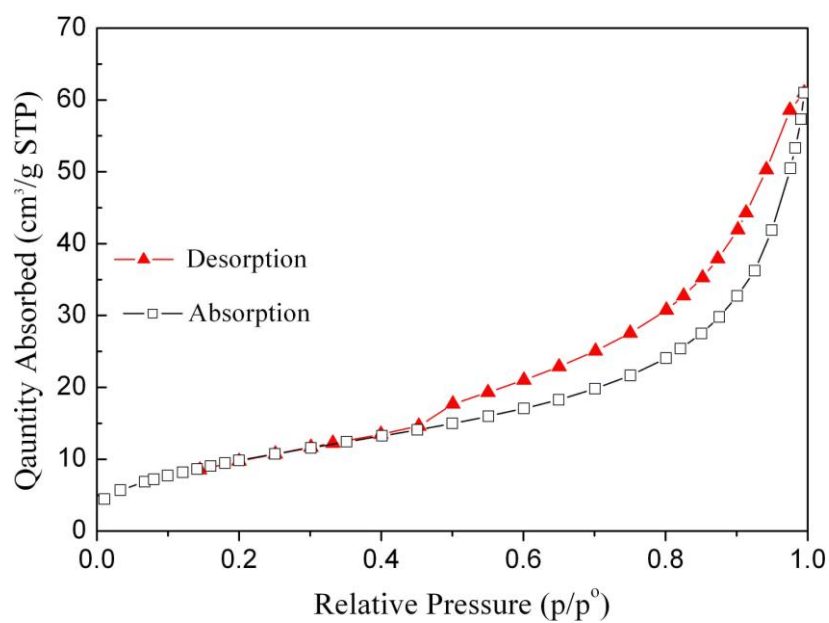

**Fig. S2** N<sub>2</sub> absorption and desorption isotherm of the Fe/ferrite composite nanotubes.

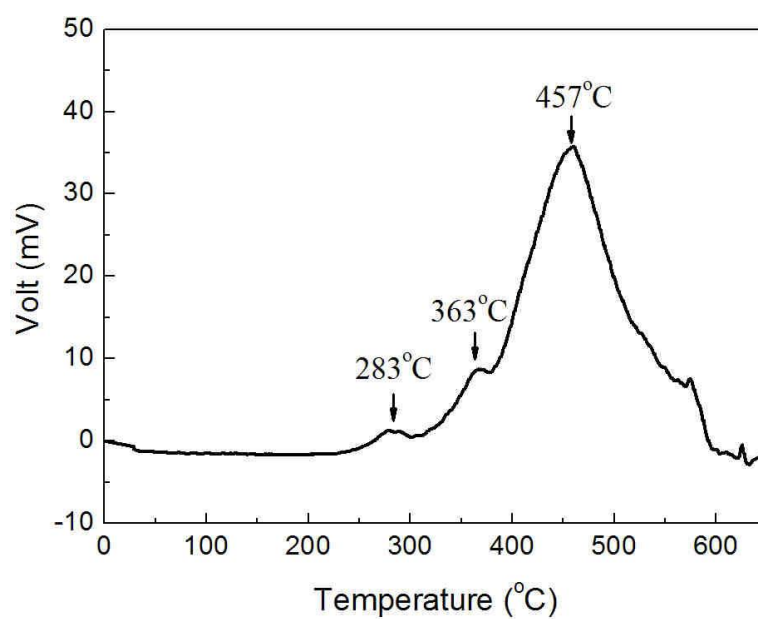

**Fig. S3** TPR spectrum of the α-FeOOH precursor nanowires.

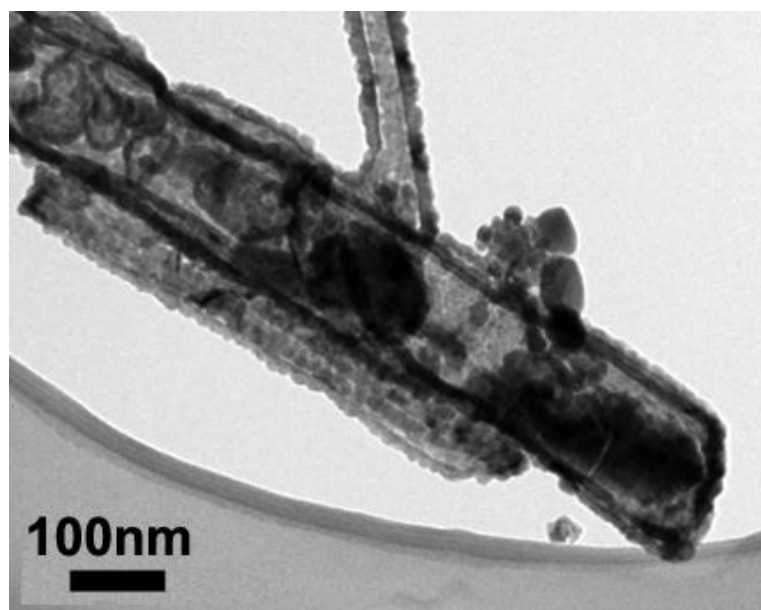

**Fig. S4** TEM image of Fe/ferrite composite nanotubes with reduction duration of 30 min.
